# Supplementary material for: Cell cycle related genes up-regulated in human colorectal development predict the overall survival of late-stage colorectal cancer patients
Source: Royal Society of Chemistry journal article supplement (doi:10.1039/c5mb00761e), 2015-12-08
Supplement: c5mb00761e1.pdf [file c5mb00761e1.pdf]

**Table S1.** Samples in NC superset to collect differentially expressed probes.

| Accession number | Cancer (%) | Normal (%) | Year      | Platform   |
|------------------|------------|------------|-----------|------------|
| GSE20916         | 91 (67.4)  | 44 (32.6)  | 2010      | GPL570     |
| GSE21510         | 19 (43.2)  | 25 (56.8)  | 2011      | GPL570     |
| GSE22598         | 17 (50.0)  | 17 (50.0)  | 2011      | GPL570     |
| GSE23878         | 35 (59.3)  | 24 (40.7)  | 2010      | GPL570     |
| GSE24514         | 34 (69.4)  | 15 (30.6)  | 2011      | GPL96      |
| GSE32323         | 17 (50.0)  | 17 (50.0)  | 2012      | GPL570     |
| GSE37364         | 27 (41.5)  | 38 (58.5)  | 2013      | GPL570     |
| GSE41258         | 186 (77.5) | 54 (22.5)  | 2012      | GPL96      |
| Total            | 426 (64.5) | 234 (35.5) | 2010-2013 | Affymetrix |

**Note:** GPL570, HG-U133A Plus2; GPL96, Affymetrix HG-U133A

**Table S2.** Logistic regression analysis between 3 probe groups (A probes, V probes and V cycle probes) and 8 clinicopathological variables.

| Variables        | A probes            |       | V probes            |                  | V cycle probes      |                  |
|------------------|---------------------|-------|---------------------|------------------|---------------------|------------------|
|                  | OR (95% CI)         | P     | OR (95% CI)         | P                | OR (95% CI)         | P                |
| Age (n=867)      | 0.993 (0.984~1.003) | 0.161 | 1.000 (0.991~1.010) | 0.951            | 1.002 (0.992~1.011) | 0.715            |
| Gender (n=933)   | 1.257 (0.971~1.627) | 0.082 | 1.193 (0.922~1.544) | 0.179            | 0.921 (0.712~1.192) | 0.530            |
| Stage (n=928)    | 0.925 (0.715~1.197) | 0.555 | 1.502 (1.159~1.945) | <b>0.002</b>     | 0.643 (0.496~0.833) | <b>8.320e-04</b> |
| Grade (n=278)    | 0.890 (0.455~1.740) | 0.733 | 0.241 (0.110~0.529) | <b>3.825e-04</b> | 3.068 (1.465~6.426) | <b>0.003</b>     |
| AdjCTX (n=614)   | 1.013 (0.737~1.393) | 0.935 | 0.520 (0.377~0.719) | <b>7.370e-05</b> | 1.870 (1.355~2.583) | <b>1.426e-04</b> |
| T status (n=678) | 0.890 (0.555~1.428) | 0.630 | 0.458 (0.279~0.754) | <b>0.002</b>     | 1.922 (1.178~3.135) | <b>0.009</b>     |
| N status (n=674) | 0.822 (0.558~1.213) | 0.324 | 0.529 (0.355~0.788) | <b>0.002</b>     | 2.053 (1.375~3.067) | <b>4.408e-04</b> |
| M status (n=677) | 0.771 (0.504~1.179) | 0.230 | 0.607 (0.395~0.935) | 0.023            | 1.893 (1.224~2.930) | <b>0.004</b>     |

**Note:** The number of samples with clear description of each variable was appended to the corresponding variable name. Significant *p* values were in bold ( $p < 0.01$ ). For rank variables, the dichotomization was conducted as follows: Stage (III+IV/I+II); Grade (III/I+II); T status (T3+T4/T1+T2); N status (N2+N3/N0+N1). Abbreviations: *AdjCTX*, whether chemotherapy was used; *OR*, odds ratio; *CI*, confidence interval.

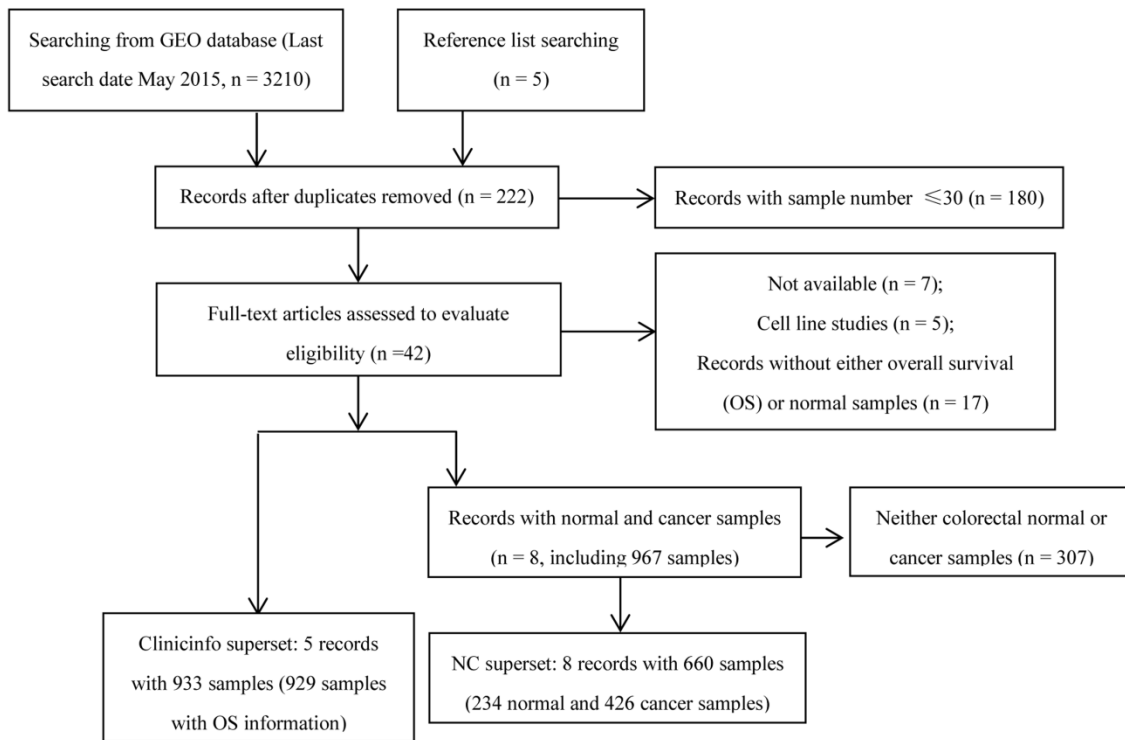

**Fig. S1** Schematic diagram of meta-analysis literature searching

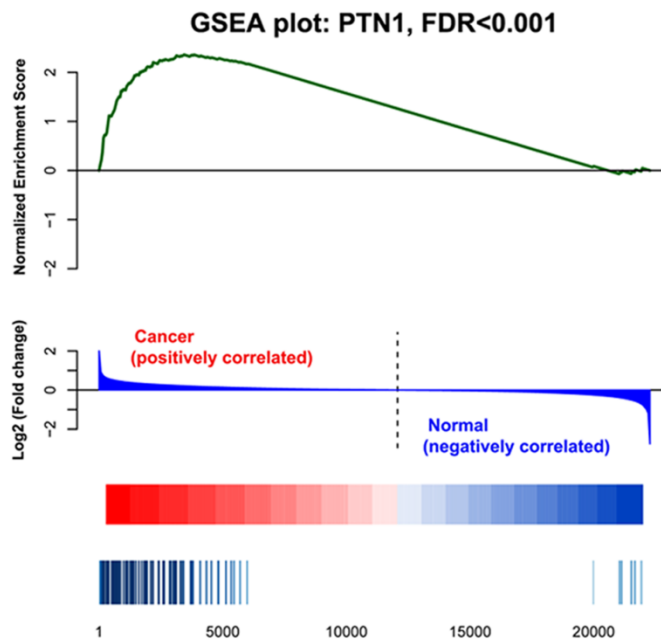

**Fig. S2** GSEA analysis of PTN\_1 in NC superset. PTN\_1 belonged to 7 DDMs, containing DEPs generally being down-regulated along developmental time axis. GSEA analysis indicated that the DEPs within PTN\_1 were significantly up-regulated in cancer with comparison to normal tissue, and therefore, PTN\_1 was referred to as a significant DDM. Note: DEP represents differentially expressed probes; DDM represents developmental down-regulating modules; the significance criterion is FDR<0.001.

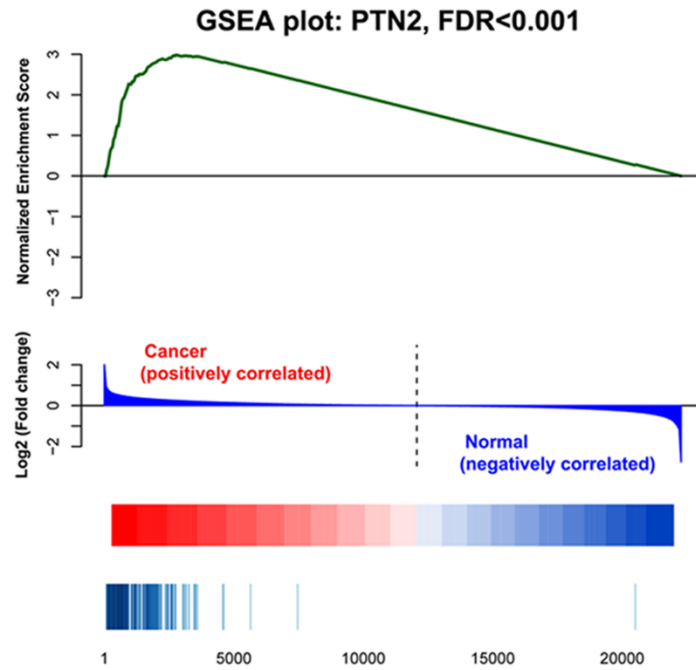

**Fig. S3** GSEA analysis of PTN\_2 in NC superset. PTN\_2 belonged to 7 DDMs. GSEA analysis indicated that the DEPs within PTN\_2 were significantly up-regulated in cancer with comparison to normal tissue, and therefore, PTN\_2 was referred to as a significant DDM.

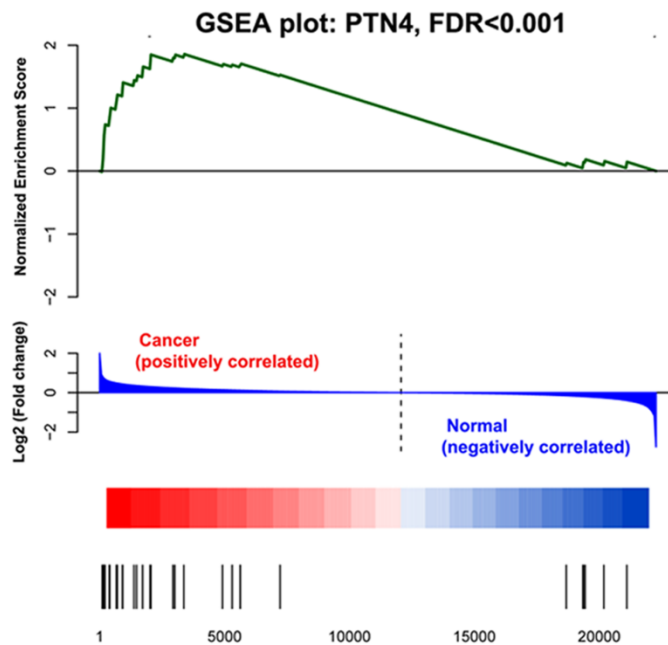

**Fig. S4** GSEA analysis of PTN\_4 in NC superset. PTN\_4 belonged to 7 DDMs. GSEA analysis indicated that the DEPs within PTN\_4 were significantly up-regulated in cancer with comparison to normal tissue, and therefore, PTN\_4 was referred to as a significant DDM.

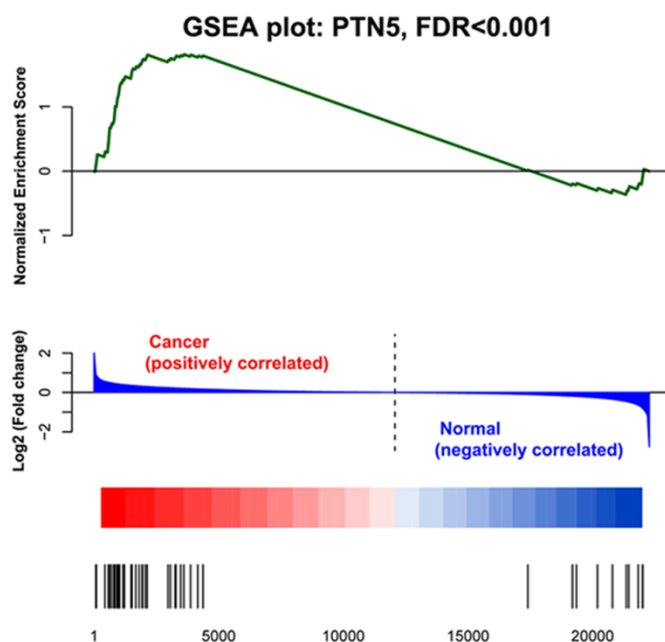

**Fig. S5** GSEA analysis of PTN\_5 in NC superset. PTN\_5 belonged to 7 DDMs. GSEA analysis indicated that the DEPs within PTN\_5 were significantly up-regulated in cancer with comparison to normal tissue, and therefore, PTN\_5 was referred to as a significant DDM.

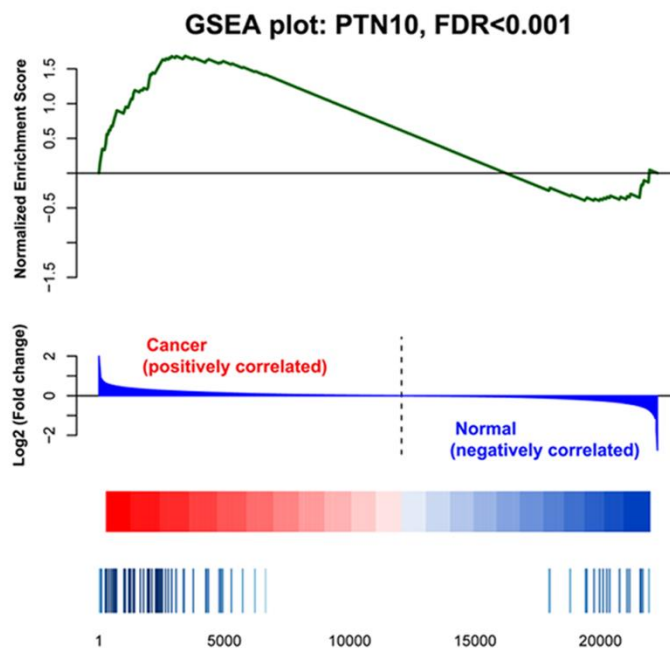

**Fig. S6** GSEA analysis of PTN\_10 in NC superset. PTN\_10 belonged to 7 DDMs. GSEA analysis indicated that the DEPs within PTN\_10 were significantly up-regulated in cancer with comparison to normal tissue, and therefore, PTN\_10 was referred to as a significant DDM.

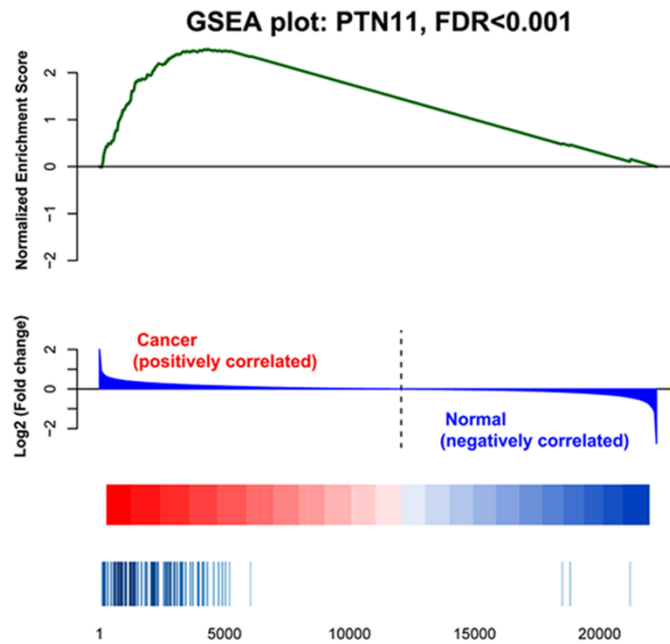

**Fig. S7** GSEA analysis of PTN\_11 in NC superset. PTN\_11 belonged to 7 DDMs. GSEA analysis indicated that the DEPs within PTN\_11 were significantly up-regulated in cancer with comparison to normal tissue, and therefore, PTN\_11 was referred to as a significant DDM.

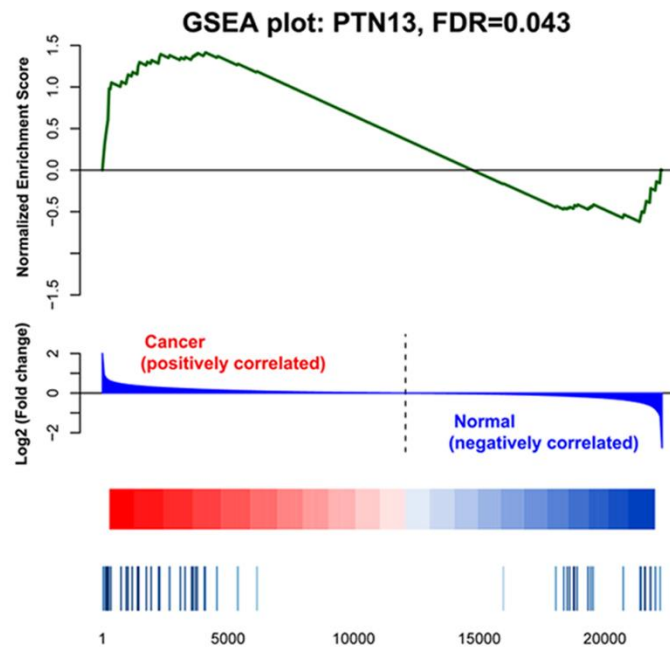

**Fig. S8** GSEA analysis of PTN\_13 in NC superset. PTN\_13 belonged to 7 DDMs. GSEA analysis indicated that the DEPs within PTN\_13 were not significantly up-regulated in cancer with comparison to normal tissue, and therefore, PTN\_13 could not be referred to as a significant DDM.

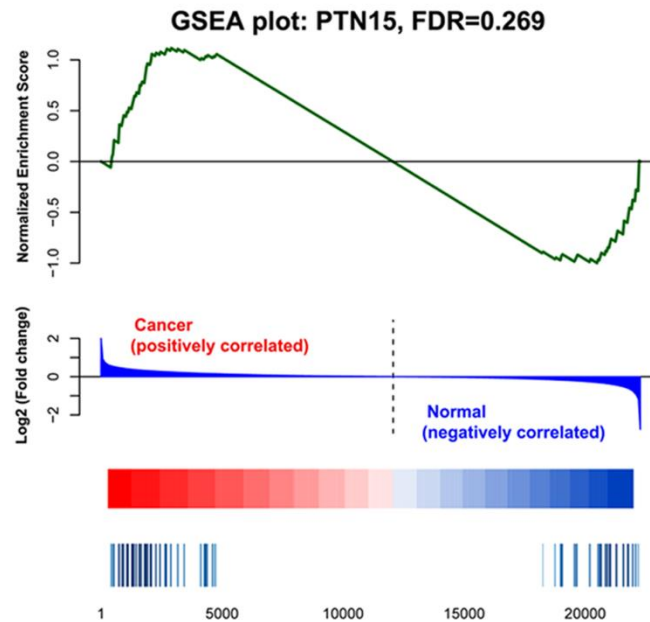

**Fig. S9** GSEA analysis of PTN\_15 in NC superset. PTN\_15 belonged to 7 DUMs, containing DEPs generally being up-regulated along developmental time axis. GSEA analysis indicated that the DEPs within PTN\_15 were not significantly down-regulated in cancer with comparison to normal tissue, and therefore, PTN\_15 could not be referred to as a significant DUM. Note: DUM represents developmental up-regulating modules; the significance criterion is  $FDR < 0.001$ .

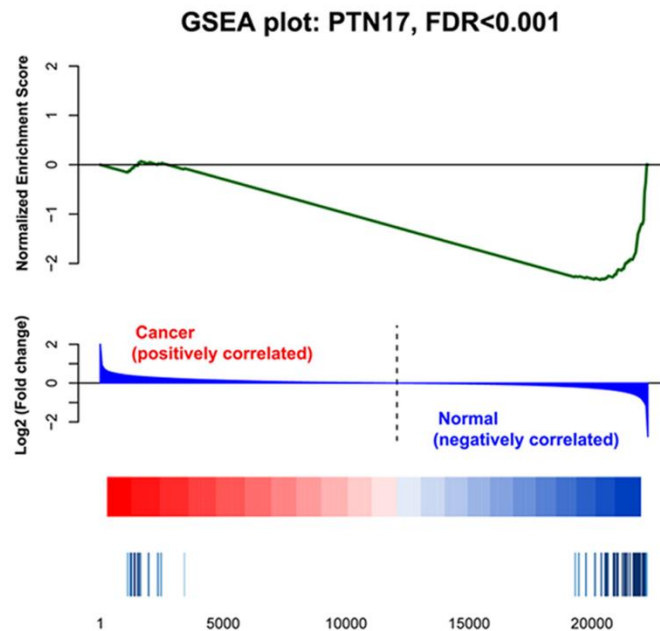

**Fig. S10** GSEA analysis of PTN\_17 in NC superset. PTN\_17 belonged to 7 DUMs. GSEA analysis indicated that the DEPs within PTN\_17 were significantly down-regulated in cancer with comparison to normal tissue, and therefore, PTN\_17 was referred to as a significant DUM.

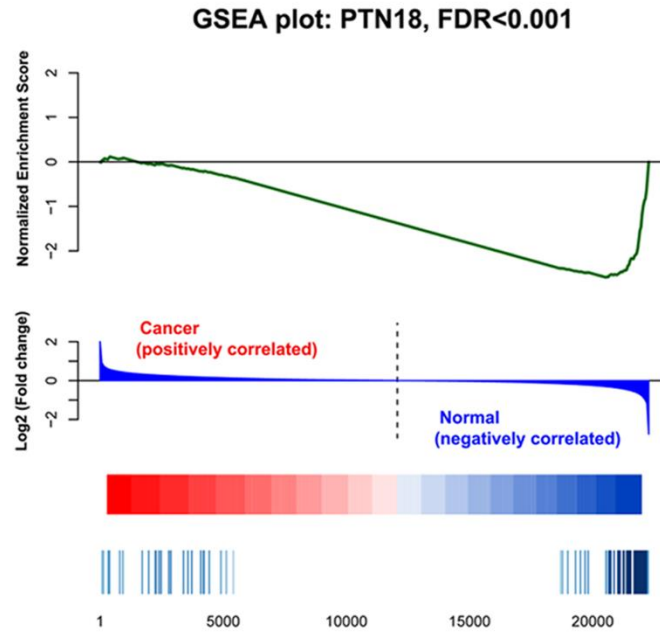

**Fig. S11** GSEA analysis of PTN\_18 in NC superset. PTN\_18 belonged to 7 DUMs. GSEA analysis indicated that the DEPs within PTN\_18 were significantly down-regulated in cancer with comparison to normal tissue, and therefore, PTN\_18 was referred to as a significant DUM.

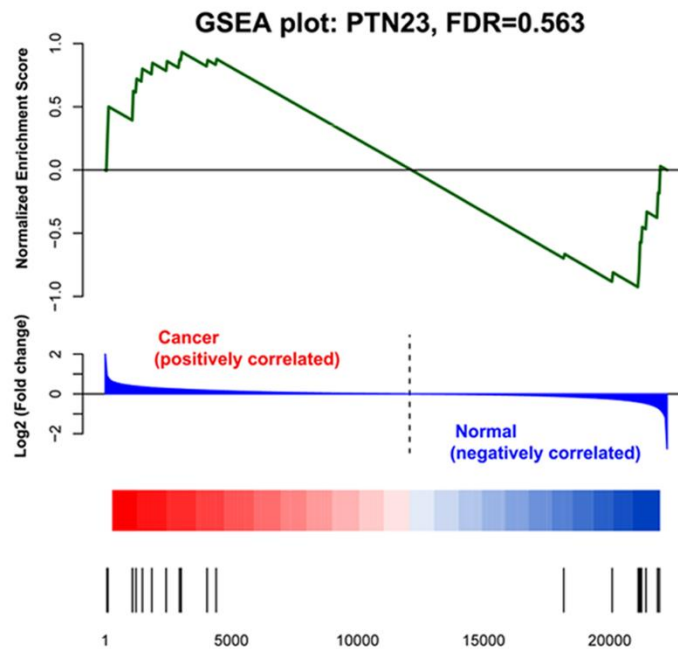

**Fig. S12** GSEA analysis of PTN\_23 in NC superset. PTN\_23 belonged to 7 DUMs. GSEA analysis indicated that the DEPs within PTN\_23 were not significantly down-regulated in cancer with comparison to normal tissue, and therefore, PTN\_23 could not be referred to as a significant DUM.

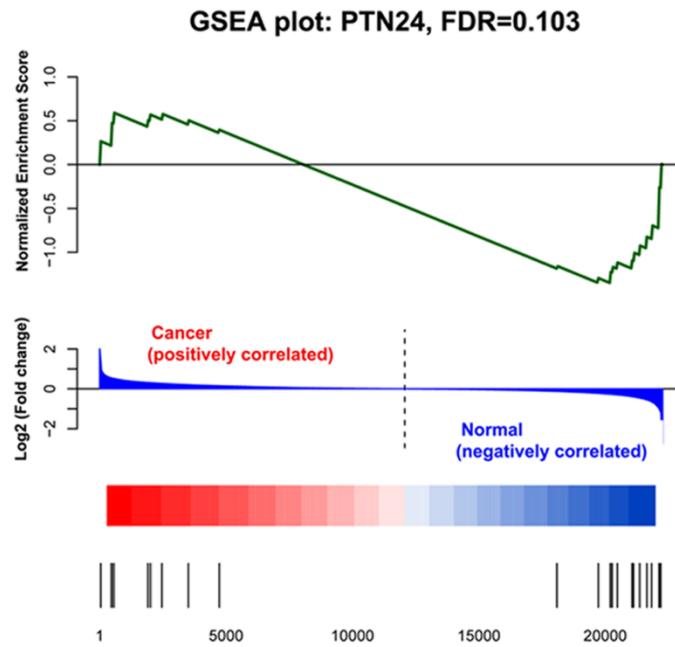

**Fig. S13** GSEA analysis of PTN\_24 in NC superset. PTN\_24 belonged to 7 DUMs. GSEA analysis indicated that the DEPs within PTN\_24 were not significantly down-regulated in cancer with comparison to normal tissue, and therefore, PTN\_24 could not be referred to as a significant DUM.

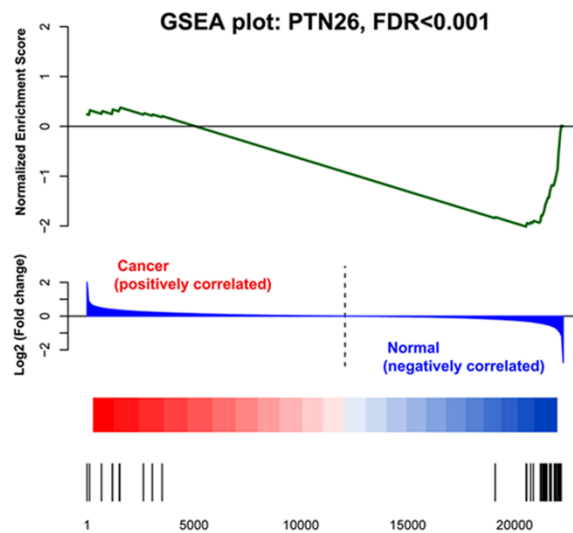

**Fig. S14** GSEA analysis of PTN\_26 in NC superset. PTN\_26 belonged to 7 DUMs. GSEA analysis indicated that the DEPs within PTN\_26 were significantly down-regulated in cancer with comparison to normal tissue, and therefore, PTN\_26 was referred to as a significant DUM.



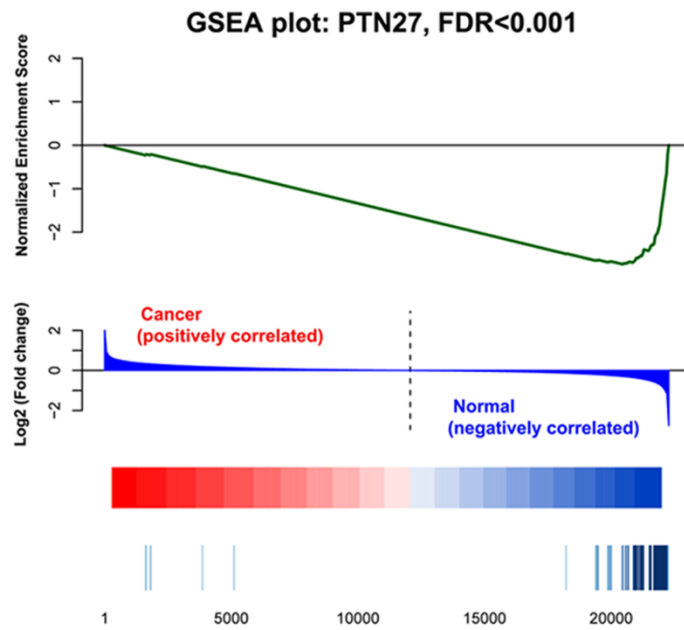

**Fig. S15** GSEA analysis of PTN\_27 in NC superset. PTN\_27 belonged to 7 DUMs. GSEA analysis indicated that the DEPs within PTN\_27 were significantly down-regulated in cancer with comparison to normal tissue, and therefore, PTN\_27 was referred to as a significant DUM.

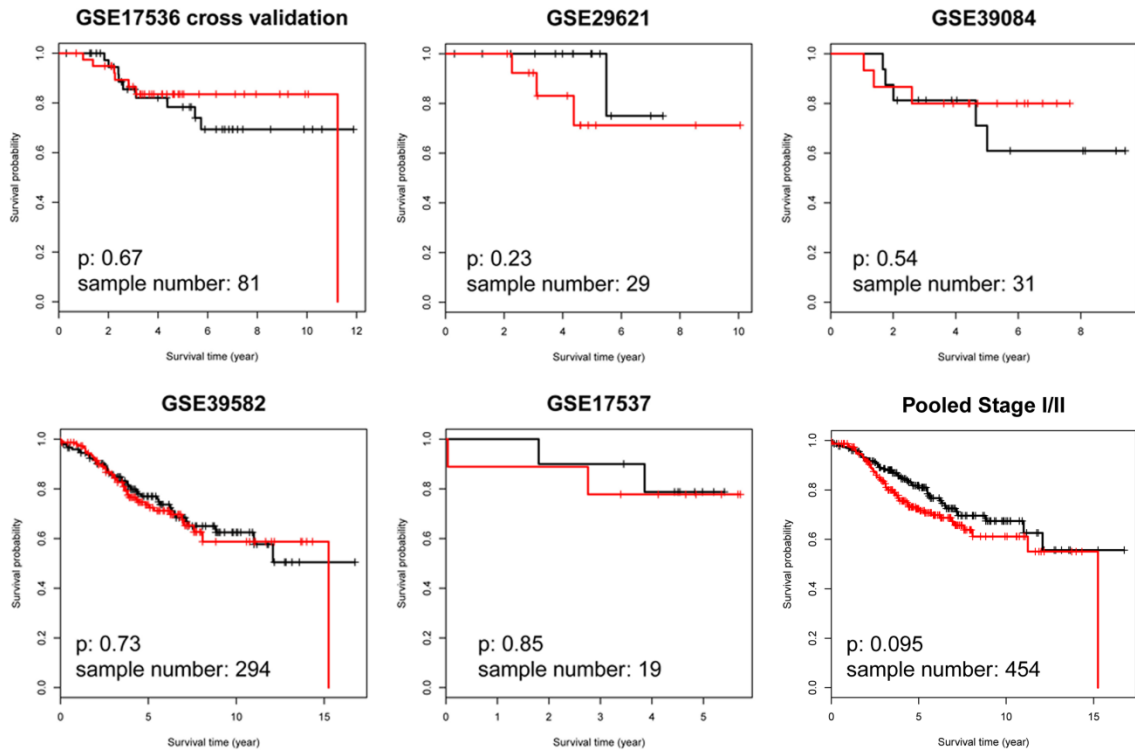

**Fig. S16** Kaplan–Meier survival analysis of 28 V cycle probes with Stage I/II patients in 5 independent data sets of Clinicoinfo superiset.

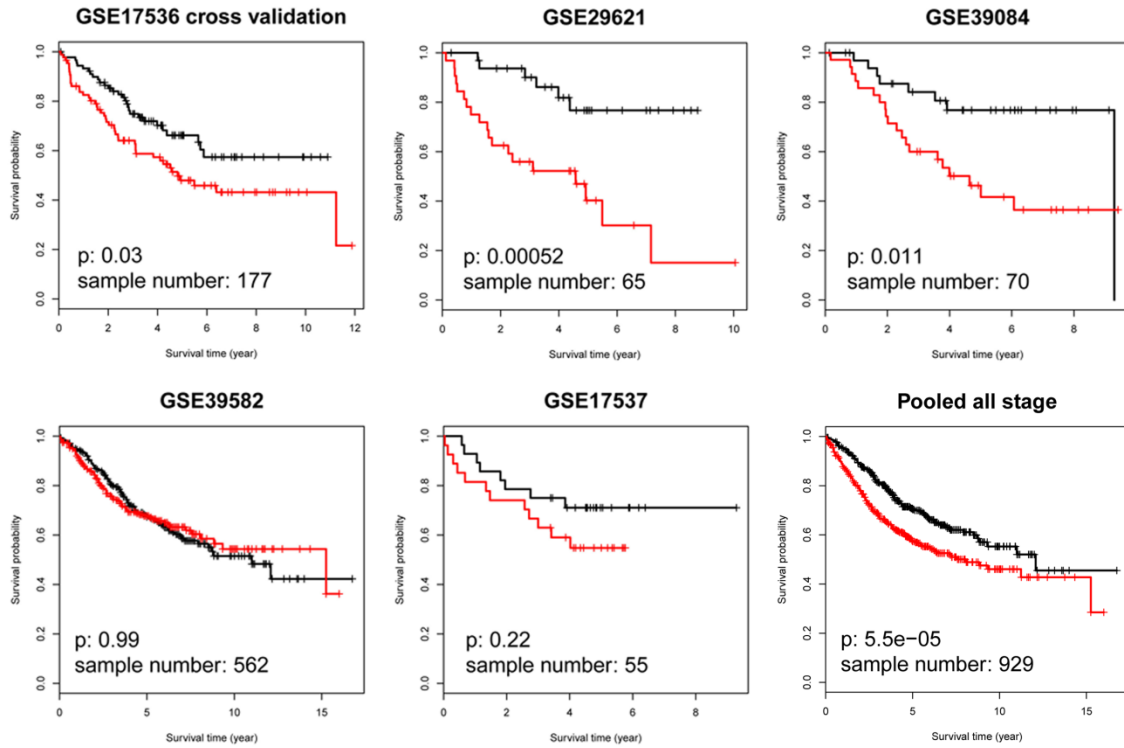

**Fig. S17** Kaplan–Meier survival analysis of 28 V cycle probes with all stage patients in 5 independent data sets of Clinicoinfo superset.

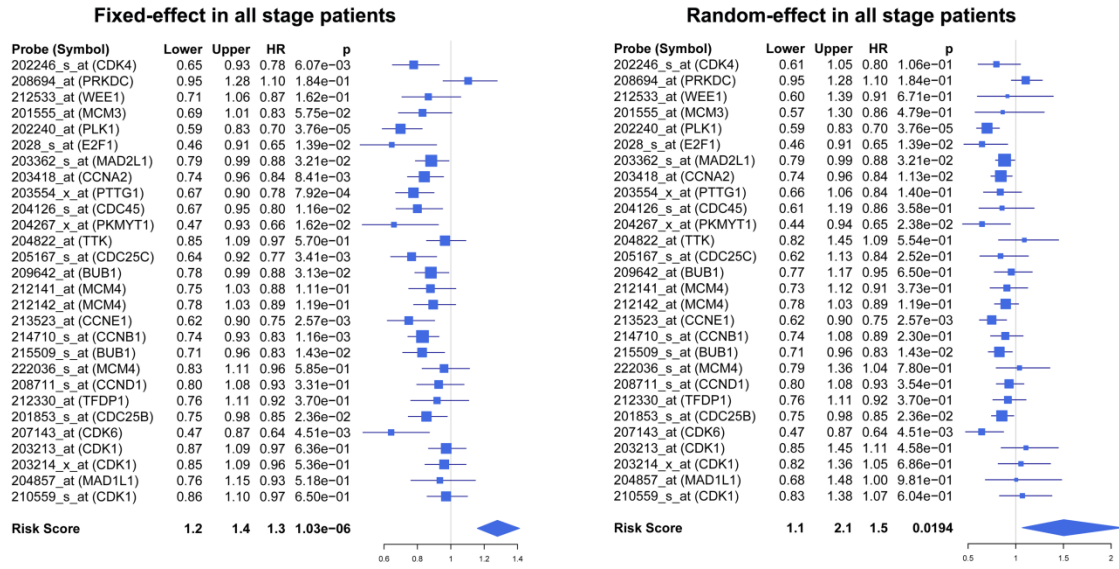

**Fig. S18** Forest plot of 28 V cycle probes with fixed-effect and random-effect model in all stage patients.

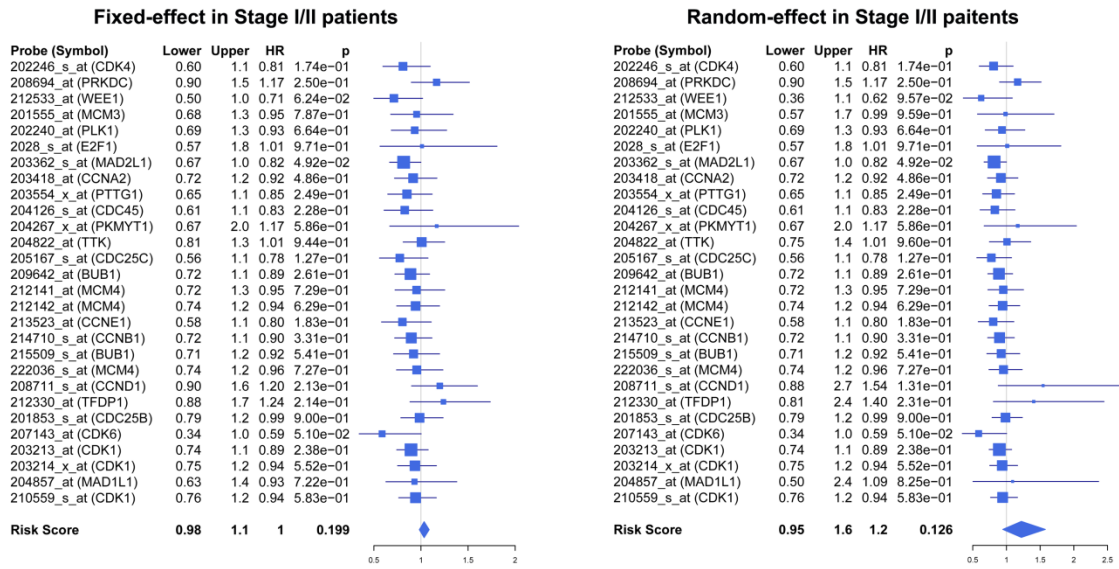

**Fig. S19** Forest plot of 28 V cycle probes with fixed-effect and random-effect model in Stage I/II patients.
